# Supplementary material for: Quantification of mutual trans influence of ligands in Pd(ii) complexes: a combined approach using isodesmic reactions and AIM analysis
Source: Royal Society of Chemistry journal article supplement (doi:10.1039/b911013e), 2009-11-12
Supplement: b911013e.pdf [file b911013e.pdf]

## Supporting Information

# Quantification of Mutual Trans Influence of Ligands in Pd(II) Complexes: A Combined Approach Using Isodesmic Reactions and AIM Analysis

*P. K. Sajith and Cherumuttathu H. Suresh\**

*Computational Modeling and Simulation Section, National Institute for Interdisciplinary Science and Technology (CSIR), Trivandrum 695 019, India.*

*E-mail: sureshch@gmail.com*

## Contents

- (1) **Table S1.** SCF energies (in a.u.) of all geometries at MPWB1K-COSMO/BS1 level  
*BS1 = LanL2DZ + f functions for Pd and 6-31++G(d,p) for rest of the atoms*
- (2) **Table S2.** Comparison of  $E_1$  values calculated at B3LYP-COSMO/BS1 method.
- (3) **Table S3.** Comparison of  $E_1$  values with water and chloroform as solvent obtained at MPWB1K-COSMO/BS1 method.
- (4) **Table S4.** Electron density value  $\rho(\mathbf{r})$  ( $\text{e/a}_0^3$ ) at bcp of trans Pd-X bond in  $[\text{PdCl}_3\text{X}]^{n-}$  obtained by single point energy calculations at MPWB1K-COSMO/dgdzvp method.
- (5) **Table S5.**  $E_{2\text{pred}}$ , actual and predicted dissociation energy (in kcal/mol) of the bonds Pd-X and Pd-Y bonds in  $[\text{Pd}^{\text{II}}\text{Cl}_2\text{XY}]^{n-}$  of 53 complexes.

### (1) Table S1. SCF energies E (in a.u.) of all geometries at MPWB1K- COSMO/BS1 level.

|                                                            |                                                                 |
|------------------------------------------------------------|-----------------------------------------------------------------|
| $[\text{PdCl}_3\text{H}_2\text{O}]^-$ , E = -1584.09541137 | $[\text{PdCl}_3\text{CO}]^-$ , E = -1620.96688807               |
| $[\text{PdCl}_3\text{Py}]^-$ , E = -1755.88995161          | $[\text{PdCl}_3\text{NH}_3]^-$ , E = -1564.25453667             |
| $[\text{PdCl}_3\text{SMe}_2]^-$ , E = -1985.71128760       | $[\text{PdCl}_3\text{C}_2\text{H}_4]^-$ , E = -1586.24498739    |
| $[\text{PdCl}_3\text{AsH}_3]^-$ , E = -3743.17116718       | $[\text{PdCl}_3\text{PH}_3]^-$ , E = -1850.87524624             |
| $[\text{PdCl}_3\text{AsMe}_3]^-$ , E = -3861.08693813      | $[\text{PdCl}_3\text{PMe}_3]^-$ , E = -1968.79627957            |
| $[\text{PdCl}_3\text{PEt}_3]^-$ , E = -2086.66529766       | $[\text{PdCl}_3\text{ONO}]^{2-}$ , E = -1712.87492674           |
| $[\text{PdCl}_3\text{F}]^{2-}$ , E = -1607.66446611        | $[\text{PdCl}_4]^{2-}$ , E = -1968.12116931                     |
| $[\text{PdCl}_3\text{Br}]^{2-}$ , E = -4079.61490270       | $[\text{PdCl}_3\text{N}_3]^{2-}$ , E = -1671.96383042           |
| $[\text{PdCl}_3\text{NO}_2]^{2-}$ , E = -1712.88962942     | $[\text{PdCl}_3\text{OH}]^{2-}$ , E = -1583.62846621            |
| $[\text{PdCl}_3\text{CN}]^{2-}$ , E = -1600.65643902       | $[\text{PdCl}_3\text{C}_6\text{H}_5]^{2-}$ , E = -1739.37234667 |
| $[\text{PdCl}_3\text{H}]^{2-}$ , E = -1508.42417198        | $[\text{PdCl}_3\text{CH}_3]^{2-}$ , E = -1547.71228455          |
| $[\text{PdCl}_3\text{SiH}_3]^{2-}$ , E = -1799.15401533    | $[\text{PdCl}_2\text{H}_2\text{O}]$ , E = -1123.60320367        |
| $[\text{PdCl}_2\text{CO}]$ , E = -1160.48095317            | $[\text{PdCl}_2\text{Py}]$ , E = -1295.41321093                 |
| $[\text{PdCl}_2\text{NH}_3]$ , E = -1103.77837583          | $[\text{PdCl}_2\text{SMe}_2]$ , E = -1525.24143631              |

|                                                                                                        |                                                                                                       |
|--------------------------------------------------------------------------------------------------------|-------------------------------------------------------------------------------------------------------|
| [PdCl <sub>2</sub> C <sub>2</sub> H <sub>4</sub> ], E = -1125.77407607                                 | [PdCl <sub>2</sub> AsH <sub>3</sub> ], E = -3282.70757895                                             |
| [PdCl <sub>2</sub> PH <sub>3</sub> ], E = -1390.41189604                                               | [PdCl <sub>2</sub> AsMe <sub>3</sub> ], E = -3400.63133922                                            |
| [PdCl <sub>2</sub> PMe <sub>3</sub> ], E = -1508.34201363                                              | [PdCl <sub>2</sub> PEt <sub>3</sub> ], E = -1626.21246997                                             |
| [PdCl <sub>2</sub> ONO], E = -1252.39792104                                                            | [PdCl <sub>2</sub> F], E = -1147.18757806                                                             |
| [PdCl <sub>3</sub> ] <sup>-</sup> , E = -1507.65221781                                                 | [PdCl <sub>2</sub> Br] <sup>-</sup> , E = -3619.14927801                                              |
| [PdCl <sub>2</sub> N <sub>3</sub> ] <sup>-</sup> , E = -1211.49760964                                  | [PdCl <sub>2</sub> NO <sub>2</sub> ] <sup>-</sup> , E = -1252.42289625                                |
| [PdCl <sub>2</sub> OH] <sup>-</sup> , E = -1123.16457851                                               | [PdCl <sub>2</sub> CN] <sup>-</sup> , E = -1140.19420140                                              |
| [PdCl <sub>2</sub> C <sub>6</sub> H <sub>5</sub> ] <sup>-</sup> , E = -1278.93243509                   | [PdCl <sub>2</sub> H] <sup>-</sup> , E = -1047.98275444                                               |
| [PdCl <sub>2</sub> CH <sub>3</sub> ] <sup>-</sup> , E = -1087.27494392                                 | [PdCl <sub>2</sub> SiH <sub>3</sub> ] <sup>-</sup> , E = -1338.71945016                               |
| [PdCl <sub>2</sub> ], E = -1047.15180156                                                               | [PdCl <sub>2</sub> COBr] <sup>-</sup> , E = -3732.45986273                                            |
| [PdCl <sub>2</sub> H <sub>2</sub> OBr] <sup>-</sup> , E = -3695.58911374                               | [PdCl <sub>2</sub> PH <sub>3</sub> CN] <sup>-</sup> , E = -1483.39990229                              |
| [PdCl <sub>2</sub> NH <sub>3</sub> Br] <sup>-</sup> , E = -3675.74712684                               | [PdCl <sub>2</sub> PH <sub>3</sub> NO <sub>2</sub> ] <sup>-</sup> , E = -1595.63582456                |
| [PdCl <sub>2</sub> AsH <sub>3</sub> CN] <sup>-</sup> , E = -3375.69712860                              | [PdCl <sub>2</sub> FPH <sub>3</sub> ] <sup>-</sup> , E = -1490.41814350                               |
| [PdCl <sub>2</sub> NH <sub>3</sub> NO <sub>2</sub> ] <sup>-</sup> , E = -1309.01998923                 | [PdCl <sub>2</sub> PyAsH <sub>3</sub> ], E = -3530.93468985                                           |
| [PdCl <sub>2</sub> COPy], E = -1408.72946711                                                           | [PdCl <sub>2</sub> ONON <sub>3</sub> ] <sup>2-</sup> , E = -1416.71742767                             |
| [PdCl <sub>2</sub> H <sub>2</sub> ONH <sub>3</sub> ], E = -1180.22411073                               | [PdCl <sub>2</sub> COCN] <sup>-</sup> , E = -1253.49677671                                            |
| [PdCl <sub>2</sub> HCH <sub>3</sub> ] <sup>2-</sup> , E = -1087.96363617                               | [PdCl <sub>2</sub> BrOH] <sup>2-</sup> , E = -3695.12082312                                           |
| [PdCl <sub>2</sub> OHPH <sub>3</sub> ] <sup>-</sup> , E = -1466.37844263                               | [PdCl <sub>2</sub> NH <sub>3</sub> SMe <sub>2</sub> ] <sup>-</sup> , E = -1581.84046357               |
| [PdCl <sub>2</sub> OHCN] <sup>2-</sup> , E = -1216.15979452                                            | [PdCl <sub>2</sub> (H <sub>2</sub> O) <sub>2</sub> ], E = -1200.06086964                              |
| [PdCl <sub>2</sub> H <sub>2</sub> ON <sub>3</sub> ] <sup>-</sup> , E = -1287.93917013                  | [PdCl <sub>2</sub> H <sub>2</sub> OCH <sub>3</sub> ] <sup>-</sup> , E = -1163.69600490                |
| [PdCl <sub>2</sub> PyCH <sub>3</sub> ] <sup>-</sup> , E = -1335.47639721                               | [PdCl <sub>2</sub> PH <sub>3</sub> SiH <sub>3</sub> ] <sup>-</sup> , E = -1681.89359033               |
| [PdCl <sub>2</sub> NH <sub>3</sub> CH <sub>3</sub> ] <sup>-</sup> , E = -1143.83807649                 | [PdCl <sub>2</sub> CNCH <sub>3</sub> ] <sup>2-</sup> , E = -1180.22770329                             |
| [PdCl <sub>2</sub> AsH <sub>3</sub> SiH <sub>3</sub> ] <sup>-</sup> , E = -3574.19212857               | [PdCl <sub>2</sub> COH] <sup>-</sup> , E = -1161.26928203                                             |
| [PdCl <sub>2</sub> OHH] <sup>2-</sup> , E = -1123.91446353                                             | [PdCl <sub>2</sub> AsH <sub>3</sub> C <sub>6</sub> H <sub>5</sub> ] <sup>-</sup> , E = -3514.41240989 |
| [PdCl <sub>2</sub> NO <sub>2</sub> H] <sup>2-</sup> , E = -1253.18159795                               | [PdCl <sub>2</sub> H <sub>2</sub> OSiH <sub>3</sub> ] <sup>-</sup> , E = -1415.13630745               |
| [PdCl <sub>2</sub> PH <sub>3</sub> C <sub>6</sub> H <sub>5</sub> ] <sup>-</sup> , E = -1622.11389869   | [PdCl <sub>2</sub> SMe <sub>2</sub> CH <sub>3</sub> ] <sup>-</sup> , E = -1565.29894798               |
| [PdCl <sub>2</sub> FSiH <sub>3</sub> ] <sup>2-</sup> , E = -1438.69168467                              | [PdCl <sub>2</sub> SMe <sub>2</sub> SiH <sub>3</sub> ] <sup>-</sup> , E = -1816.73890905              |
| [PdCl <sub>2</sub> COSiH <sub>3</sub> ] <sup>-</sup> , E = -1451.99794713                              | [PdCl <sub>2</sub> (AsMe <sub>3</sub> ) <sub>2</sub> ], E = -5754.03840377                            |
| [PdCl <sub>2</sub> FH] <sup>2-</sup> , E = -1147.96429472                                              | [PdCl <sub>2</sub> (PMe <sub>3</sub> ) <sub>2</sub> ], E = -1969.45515665                             |
| [PdCl <sub>2</sub> (AsMe <sub>3</sub> )(PMe <sub>3</sub> )], E = -3861.74682423                        | [PdCl <sub>2</sub> CN(PMe <sub>3</sub> )] <sup>-</sup> , E = -1601.31826678                           |
| [PdCl <sub>2</sub> (AsMe <sub>3</sub> )(PEt <sub>3</sub> )], E = -3979.61623989                        | [PdCl <sub>2</sub> H <sub>2</sub> O(PMe <sub>3</sub> )], E = -1584.77304790                           |
| [PdCl <sub>2</sub> H <sub>2</sub> O(AsMe <sub>3</sub> )], E = -3477.06264116                           | [PdCl <sub>2</sub> (AsMe <sub>3</sub> )CH <sub>3</sub> ] <sup>-</sup> , E = -3440.65752551            |
| [PdCl <sub>2</sub> (PMe <sub>3</sub> )SiH <sub>3</sub> ] <sup>-</sup> , E = -1799.80233764             | [PdCl <sub>2</sub> C <sub>6</sub> H <sub>5</sub> CH <sub>3</sub> ] <sup>2-</sup> , E = -1318.91188476 |
| [PdCl <sub>2</sub> OH(PMe <sub>3</sub> )] <sup>-</sup> , E = -1584.29663414                            | [PdCl <sub>2</sub> CH <sub>3</sub> SiH <sub>3</sub> ] <sup>2-</sup> , E = -1378.68824353              |
| [PdCl <sub>2</sub> C <sub>6</sub> H <sub>5</sub> SiH <sub>3</sub> ] <sup>2-</sup> , E = -1570.35138503 | [PdCl <sub>2</sub> (SiH <sub>3</sub> ) <sub>2</sub> ] <sup>2-</sup> , E = -1630.12830064              |
| [PdCl <sub>2</sub> (CH <sub>3</sub> ) <sub>2</sub> ] <sup>2-</sup> , E = -1127.24685742                | [PdCl <sub>2</sub> HSiH <sub>3</sub> ] <sup>2-</sup> , E = -1339.40208335                             |

(2) Table S2. Comparison of E<sub>1</sub> values calculated at two different levels of theory.

| Trans Ligand                  | B3LYP-COSMO/<br>BS1 | MPWB1K-COSMO/<br>BS1 |
|-------------------------------|---------------------|----------------------|
| H <sub>2</sub> O              | 7.84                | 5.15                 |
| CO                            | 12.08               | 9.09                 |
| NH <sub>3</sub>               | 18.17               | 15.22                |
| C <sub>2</sub> H <sub>4</sub> | 21.68               | 18.51                |
| PH <sub>3</sub>               | 25.92               | 23.26                |
| F <sup>-</sup>                | 17.79               | 14.76                |
| Cl <sup>-</sup>               | 23.03               | 19.74                |
| Br <sup>-</sup>               | 25.48               | 21.83                |

|                               |       |       |
|-------------------------------|-------|-------|
| CH <sub>3</sub> <sup>-</sup>  | 42.29 | 39.58 |
| SiH <sub>3</sub> <sup>-</sup> | 43.75 | 41.32 |

**(3) Table S3. Comparison of E<sub>1</sub> values with water and chloroform as solvent obtained at MPWB1K-COSMO/BS1 method.**

| Trans Ligand                  | Water as solvent | Chloroform as solvent |
|-------------------------------|------------------|-----------------------|
| H <sub>2</sub> O              | 5.15             | 6.73                  |
| CO                            | 9.09             | 10.22                 |
| NH <sub>3</sub>               | 15.22            | 17.32                 |
| C <sub>2</sub> H <sub>4</sub> | 18.51            | 20.35                 |
| PH <sub>3</sub>               | 23.26            | 25.66                 |
| F <sup>-</sup>                | 14.76            | 33.57                 |
| Cl <sup>-</sup>               | 19.74            | 37.83                 |
| Br <sup>-</sup>               | 21.83            | 39.71                 |
| CH <sub>3</sub> <sup>-</sup>  | 39.58            | 58.91                 |
| SiH <sub>3</sub> <sup>-</sup> | 41.32            | 59.87                 |

**(4) Table S4. Comparison of ρ(r) values at bcp of trans Pd-X bond in [PdCl<sub>3</sub>X]<sup>n-</sup> obtained at two different levels of theory.**

| Trans Ligand                  | MPWB1K-COSMO/BS1 | MPWB1K-COSMO/DGDZVP |
|-------------------------------|------------------|---------------------|
| H <sub>2</sub> O              | 0.08481          | 0.08086             |
| CO                            | 0.07921          | 0.07609             |
| NH <sub>3</sub>               | 0.07456          | 0.07063             |
| C <sub>2</sub> H <sub>4</sub> | 0.07473          | 0.07002             |
| PH <sub>3</sub>               | 0.06657          | 0.06316             |
| F <sup>-</sup>                | 0.07564          | 0.07177             |
| Cl <sup>-</sup>               | 0.07484          | 0.07099             |
| Br <sup>-</sup>               | 0.07272          | 0.06848             |
| CH <sub>3</sub> <sup>-</sup>  | 0.04497          | 0.04096             |
| SiH <sub>3</sub> <sup>-</sup> | 0.04237          | 0.03908             |

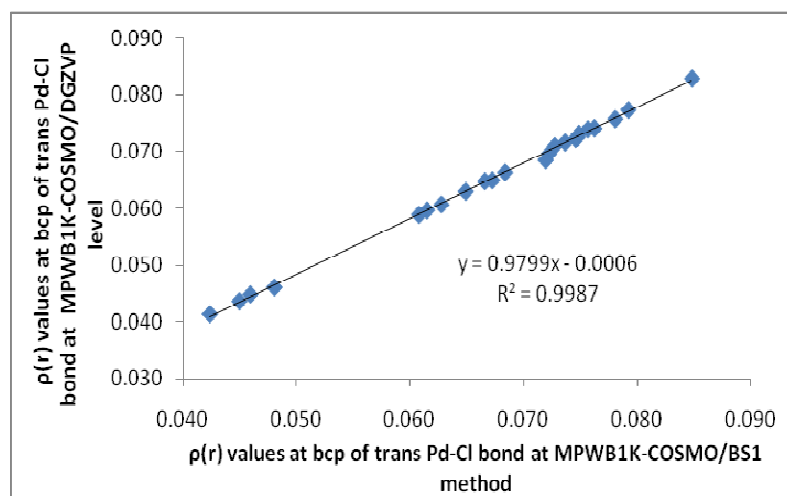

**Figure S1.** Correlation between  $\rho(r)$  values calculated at MPWB1K-COSMO/BS1 and single point energy calculations at MPWB1K-COSMO/DGDZVP methods.

**(5) Table S5.  $E_{2\text{pred}}$ , actual and predicted dissociation energy (in kcal/mol) of the bonds Pd-X and Pd-Y bonds in  $[\text{Pd}^{\text{II}}\text{Cl}_2\text{XY}]^{n-}$  of 53 complexes.**

The equations used for predictions are,

$$E_{2\text{pred}} = -2709.906\rho_{1X} - 2217.285\rho_{1Y} + 19763.654\rho_{1X}\rho_{1Y} + 274.334$$

$$D_{2X\text{pred}} = D_{1X} + 1924.836\rho_{1X} + 2217.285\rho_{1Y} - 19763.654\rho_{1X}\rho_{1Y} - 198.584$$

$$D_{2Y\text{pred}} = D_{1Y} + 2709.906\rho_{1X} + 1431.93\rho_{1Y} - 19763.654\rho_{1X}\rho_{1Y} - 198.584$$

| Sl. No. | Ligands in the               |                               | $E_{2\text{pred}}$ | Calculated | Predicted | Calculated | Predicted |
|---------|------------------------------|-------------------------------|--------------------|------------|-----------|------------|-----------|
|         | trans<br>X                   | positions<br>Y                |                    | $D_{2X}$   | $D_{2X}$  | $D_{2Y}$   | $D_{2Y}$  |
| 1       | H <sub>2</sub> O             | Br <sup>-</sup>               | 5.15               | 21.21      | 27.33     | 42.81      | 41.72     |
| 2       | NH <sub>3</sub>              | Br <sup>-</sup>               | 18.20              | 39.07      | 40.90     | 32.04      | 28.67     |
| 3       | PH <sub>3</sub>              | CN <sup>-</sup>               | 35.44              | 30.76      | 29.68     | 43.30      | 42.84     |
| 4       | NO <sub>2</sub> <sup>-</sup> | PH <sub>3</sub>               | 26.45              | 30.02      | 31.31     | 35.29      | 38.65     |
| 5       | NH <sub>3</sub>              | NO <sub>2</sub> <sup>-</sup>  | 18.79              | 38.60      | 40.30     | 41.12      | 38.95     |
| 6       | Py                           | AsH <sub>3</sub>              | 19.20              | 31.64      | 35.02     | 40.57      | 41.85     |
| 7       | ONO <sup>-</sup>             | N <sub>3</sub> <sup>-</sup>   | 14.10              | 27.44      | 29.63     | 40.22      | 40.20     |
| 8       | CO                           | CN <sup>-</sup>               | 17.39              | 22.94      | 26.71     | 60.76      | 60.89     |
| 9       | OH <sup>-</sup>              | PH <sub>3</sub>               | 33.07              | 42.37      | 38.39     | 35.88      | 32.03     |
| 10      | Br <sup>-</sup>              | OH <sup>-</sup>               | 24.86              | 24.19      | 22.03     | 45.50      | 46.58     |
| 11      | OH <sup>-</sup>              | CN <sup>-</sup>               | 34.57              | 41.77      | 36.89     | 47.83      | 43.70     |
| 12      | H <sub>2</sub> O             | H <sub>2</sub> O              | -1.39              | 32.40      | 33.87     | 32.40      | 33.85     |
| 13      | OH <sup>-</sup>              | PMe <sub>3</sub>              | 37.60              | 34.88      | 33.87     | 47.84      | 45.24     |
| 14      | CN <sup>-</sup>              | PMe <sub>3</sub>              | 41.02              | 35.93      | 37.27     | 42.82      | 41.81     |
| 15      | Py                           | CH <sub>3</sub> <sup>-</sup>  | 35.82              | 15.54      | 18.40     | 93.07      | 95.72     |
| 16      | PH <sub>3</sub>              | SiH <sub>3</sub> <sup>-</sup> | 55.73              | 10.95      | 9.39      | 68.84      | 68.19     |
| 17      | AsH <sub>3</sub>             | SiH <sub>3</sub> <sup>-</sup> | 52.39              | 9.95       | 8.68      | 70.63      | 71.53     |

|    |                                            |                                            |        |       |       |        |        |
|----|--------------------------------------------|--------------------------------------------|--------|-------|-------|--------|--------|
| 18 | CO                                         | H <sup>-</sup>                             | 29.74  | 12.87 | 14.35 | 88.15  | 87.82  |
| 19 | NO <sub>2</sub> <sup>-</sup>               | H <sup>-</sup>                             | 42.87  | 14.28 | 14.89 | 69.56  | 74.68  |
| 20 | PH <sub>3</sub>                            | C <sub>6</sub> H <sub>5</sub> <sup>-</sup> | 50.61  | 15.55 | 14.51 | 76.27  | 75.05  |
| 21 | H <sub>2</sub> O                           | SiH <sub>3</sub> <sup>-</sup>              | 21.57  | 6.79  | 10.91 | 101.11 | 102.36 |
| 22 | F <sup>-</sup>                             | SiH <sub>3</sub> <sup>-</sup>              | 38.74  | 8.31  | 11.04 | 82.90  | 85.18  |
| 23 | SMe <sub>2</sub>                           | CH <sub>3</sub> <sup>-</sup>               | 40.52  | 13.40 | 12.82 | 89.51  | 91.02  |
| 24 | CO                                         | SiH <sub>3</sub> <sup>-</sup>              | 32.06  | 7.83  | 12.03 | 90.99  | 91.87  |
| 25 | F <sup>-</sup>                             | H <sup>-</sup>                             | 36.18  | 14.15 | 13.61 | 80.87  | 81.38  |
| 26 | PMe <sub>3</sub>                           | PMe <sub>3</sub>                           | 46.10  | 35.97 | 36.75 | 35.97  | 36.73  |
| 27 | AsMe <sub>3</sub>                          | PEt <sub>3</sub>                           | 44.90  | 31.88 | 32.89 | 38.65  | 39.45  |
| 28 | AsMe <sub>3</sub>                          | CH <sub>3</sub>                            | 60.34  | 18.58 | 17.44 | 69.85  | 71.20  |
| 29 | C <sub>6</sub> H <sub>5</sub> <sup>-</sup> | CH <sub>3</sub> <sup>-</sup>               | 87.11  | 35.45 | 38.56 | 40.53  | 44.44  |
| 30 | CH <sub>3</sub> <sup>-</sup>               | CH <sub>3</sub> <sup>-</sup>               | 92.72  | 35.80 | 38.84 | 35.80  | 38.82  |
| 31 | SiH <sub>3</sub> <sup>-</sup>              | SiH <sub>3</sub> <sup>-</sup>              | 101.04 | 23.13 | 22.90 | 23.13  | 22.89  |
| 32 | H <sup>-</sup>                             | SiH <sub>3</sub> <sup>-</sup>              | 94.38  | 21.83 | 23.19 | 29.70  | 29.55  |
| 33 | H <sup>-</sup>                             | CH <sub>3</sub> <sup>-</sup>               | 90.98  | 25.63 | 26.59 | 41.42  | 40.57  |
| 34 | CO                                         | Br <sup>-</sup>                            | 12.28  | 27.97 | 31.81 | 38.42  | 34.59  |
| 35 | AsH <sub>3</sub>                           | CN <sup>-</sup>                            | 32.89  | 28.93 | 28.18 | 44.27  | 45.38  |
| 36 | F <sup>-</sup>                             | PH <sub>3</sub>                            | 21.27  | 29.66 | 28.52 | 46.36  | 43.83  |
| 37 | CO                                         | Py                                         | 10.00  | 31.52 | 34.09 | 45.07  | 44.20  |
| 38 | H <sub>2</sub> O                           | NH <sub>3</sub>                            | 4.15   | 24.91 | 28.32 | 53.54  | 54.92  |
| 39 | NH <sub>3</sub>                            | SMe <sub>2</sub>                           | 17.52  | 39.81 | 41.57 | 37.30  | 35.80  |
| 40 | H <sub>2</sub> O                           | N <sub>3</sub> <sup>-</sup>                | 5.42   | 22.29 | 27.05 | 50.55  | 48.88  |
| 41 | H <sub>2</sub> O                           | AsMe <sub>3</sub>                          | 10.54  | 15.88 | 21.93 | 66.82  | 67.22  |
| 42 | H <sub>2</sub> O                           | PMe <sub>3</sub>                           | 11.23  | 15.68 | 21.25 | 71.56  | 71.60  |
| 43 | H <sub>2</sub> O                           | CH <sub>3</sub> <sup>-</sup>               | 20.16  | 9.42  | 12.31 | 111.66 | 111.38 |
| 44 | NH <sub>3</sub>                            | CH <sub>3</sub> <sup>-</sup>               | 38.84  | 17.29 | 20.26 | 90.88  | 92.71  |
| 45 | CN                                         | CH <sub>3</sub> <sup>-</sup>               | 56.46  | 21.19 | 21.83 | 74.44  | 75.09  |
| 46 | OH <sup>-</sup>                            | H <sup>-</sup>                             | 51.43  | 20.51 | 20.03 | 64.03  | 66.12  |
| 47 | AsH <sub>3</sub>                           | C <sub>6</sub> H <sub>5</sub> <sup>-</sup> | 47.47  | 14.52 | 13.60 | 78.05  | 78.19  |
| 48 | SMe <sub>2</sub>                           | SiH <sub>3</sub> <sup>-</sup>              | 42.50  | 10.55 | 10.84 | 78.74  | 81.42  |
| 49 | AsMe <sub>3</sub>                          | AsMe <sub>3</sub>                          | 42.97  | 33.95 | 34.82 | 33.95  | 34.80  |
| 50 | AsMe <sub>3</sub>                          | PMe <sub>3</sub>                           | 44.21  | 32.53 | 33.58 | 37.44  | 38.62  |
| 51 | PMe <sub>3</sub>                           | SiH <sub>3</sub> <sup>-</sup>              | 65.25  | 16.98 | 17.60 | 55.43  | 58.67  |
| 52 | C <sub>6</sub> H <sub>5</sub> <sup>-</sup> | SiH <sub>3</sub> <sup>-</sup>              | 90.40  | 32.31 | 35.27 | 29.47  | 33.52  |
| 53 | CH <sub>3</sub> <sup>-</sup>               | SiH <sub>3</sub> <sup>-</sup>              | 96.17  | 33.84 | 35.39 | 25.92  | 27.75  |
